# Supplementary material for: Investigation of glucose-6-phosphate dehydrogenase (G6PD) deficiency prevalence in a Plasmodium vivax-endemic area in the Republic of Korea (ROK)
Source: PubMed Central journal article supplement (PMC7465311; doi:10.1186/s12936-020-03393-4), 2020-09-01
Supplement: 12936_2020_3393_MOESM3_ESM.pdf [file 12936_2020_3393_MOESM3_ESM.pdf]

Exon 9

Table with columns for GEDF sequence, exon 9, exon 10, exon 11, exon 12, and RefSeq ID. The table contains multiple rows of genomic data for various GEDF fragments (e.g., GEDF-frag-III 7.11-141, 2-GEDF-frag-III 7.11-89, etc.) with their corresponding DNA sequence and RefSeq identifiers.







# Exon 12

| GenBank ID                 | Sequence                                                             |
|----------------------------|----------------------------------------------------------------------|
| exon 9                     | .....940 950 960 970 980 990 1000 1010 1020 1030 1040 1050 1060 1070 |
| exon 10                    | .....                                                                |
| exon 11                    | .....                                                                |
| exon 12                    | .....                                                                |
| exon 13                    | .....                                                                |
| 1-GFPD-frag-III 7.11-141   | .....                                                                |
| 2-GFPD-frag-III 7.11-188   | .....                                                                |
| 3-GFPD-frag-III 7.11-188   | .....                                                                |
| 4-GFPD-frag-III 7.11-141   | .....                                                                |
| 5-GFPD-frag-III 7.11-141   | .....                                                                |
| 6-GFPD-frag-III 7.11-159   | .....                                                                |
| 7-GFPD-frag-III 7.11-141   | .....                                                                |
| 8-GFPD-frag-III 7.11-114   | .....                                                                |
| 9-GFPD-frag-III 7.11-250   | .....                                                                |
| 10-GFPD-frag-III 7.11-249  | .....                                                                |
| 11-GFPD-frag-III 7.11-227  | .....                                                                |
| 12-GFPD-frag-III 7.11-179  | .....                                                                |
| 13-GFPD-frag-III 7.11-256  | .....                                                                |
| 14-GFPD-frag-III 7.11-205  | .....                                                                |
| 15-GFPD-frag-III 7.11-244  | .....                                                                |
| 16-GFPD-frag-III 7.11-204  | .....                                                                |
| 17-GFPD-frag-III 7.11-2    | .....                                                                |
| 18-GFPD-frag-III 7.11-227  | .....                                                                |
| 19-GFPD-frag-III 7.11-202  | .....                                                                |
| 20-GFPD-frag-III 7.11-115  | .....                                                                |
| 21-GFPD-frag-III 7.11-106  | .....                                                                |
| 22-GFPD-frag-III 7.11-186  | .....                                                                |
| 23-GFPD-frag-III 7.11-16   | .....                                                                |
| 24-GFPD-frag-III 7.25-11   | .....                                                                |
| 25-GFPD-frag-III 7.25-52   | .....                                                                |
| 26-GFPD-frag-III 7.25-69   | .....                                                                |
| 27-GFPD-frag-III 7.25-70   | .....                                                                |
| 28-GFPD-frag-III 7.25-78   | .....                                                                |
| 29-GFPD-frag-III 7.25-78   | .....                                                                |
| 30-GFPD-frag-III 7.25-80   | .....                                                                |
| 31-GFPD-frag-III 7.25-82   | .....                                                                |
| 32-GFPD-frag-III 7.25-82   | .....                                                                |
| 33-GFPD-frag-III 7.25-82   | .....                                                                |
| 34-GFPD-frag-III 7.25-101  | .....                                                                |
| 35-GFPD-frag-III 7.25-114  | .....                                                                |
| 36-GFPD-frag-III 7.25-115  | .....                                                                |
| 37-GFPD-frag-III 7.25-116  | .....                                                                |
| 38-GFPD-frag-III 7.25-129  | .....                                                                |
| 39-GFPD-frag-III 7.25-138  | .....                                                                |
| 40-GFPD-frag-III 7.25-138  | .....                                                                |
| 41-GFPD-frag-III 7.25-151  | .....                                                                |
| 42-GFPD-frag-III 7.25-155  | .....                                                                |
| 43-GFPD-frag-III 7.25-161  | .....                                                                |
| 44-GFPD-frag-III 7.25-161  | .....                                                                |
| 45-GFPD-frag-III 7.25-168  | .....                                                                |
| 46-GFPD-frag-III 7.25-174  | .....                                                                |
| 47-GFPD-frag-III 7.25-181  | .....                                                                |
| 48-GFPD-frag-III 7.25-181  | .....                                                                |
| 49-GFPD-frag-III 7.25-194  | .....                                                                |
| 50-GFPD-frag-III 7.25-194  | .....                                                                |
| 51-GFPD-frag-III 7.25-197  | .....                                                                |
| 52-GFPD-frag-III 7.25-214  | .....                                                                |
| 53-GFPD-frag-III 7.25-214  | .....                                                                |
| 54-GFPD-frag-III 7.25-219  | .....                                                                |
| 55-GFPD-frag-III 7.25-236  | .....                                                                |
| 56-GFPD-frag-III 7.25-237  | .....                                                                |
| 57-GFPD-frag-III 7.25-243  | .....                                                                |
| 58-GFPD-frag-III 7.25-243  | .....                                                                |
| 59-GFPD-frag-III 7.25-249  | .....                                                                |
| 60-GFPD-frag-III 7.25-211  | .....                                                                |
| 61-GFPD-frag-III 7.01-170  | .....                                                                |
| 62-GFPD-frag-III 7.01-170  | .....                                                                |
| 63-GFPD-frag-III 7.01-251  | .....                                                                |
| 64-GFPD-frag-III 7.01-169  | .....                                                                |
| 65-GFPD-frag-III 7.01-156  | .....                                                                |
| 66-GFPD-frag-III 7.01-194  | .....                                                                |
| 67-GFPD-frag-III 7.01-83   | .....                                                                |
| 68-GFPD-frag-III 7.01-88   | .....                                                                |
| 69-GFPD-frag-III 7.01-126  | .....                                                                |
| 70-GFPD-frag-III 7.01-189  | .....                                                                |
| 71-GFPD-frag-III 7.01-119  | .....                                                                |
| 72-GFPD-frag-III 7.01-234  | .....                                                                |
| 73-GFPD-frag-III 7.01-234  | .....                                                                |
| 74-GFPD-frag-III 7.01-193  | .....                                                                |
| 75-GFPD-frag-III 7.01-191  | .....                                                                |
| 76-GFPD-frag-III 7.01-245  | .....                                                                |
| 77-GFPD-frag-III 7.01-241  | .....                                                                |
| 78-GFPD-frag-III 7.01-18   | .....                                                                |
| 79-GFPD-frag-III 7.01-175  | .....                                                                |
| 80-GFPD-frag-III 7.01-215  | .....                                                                |
| 81-GFPD-frag-III 7.01-157  | .....                                                                |
| 82-GFPD-frag-III 7.01-10   | .....                                                                |
| 83-GFPD-frag-III 7.01-248  | .....                                                                |
| 84-GFPD-frag-III 7.01-279  | .....                                                                |
| 85-GFPD-frag-III 8.1-37    | .....                                                                |
| 86-GFPD-frag-III 8.1-246   | .....                                                                |
| 87-GFPD-frag-III 8.1-31    | .....                                                                |
| 88-GFPD-frag-III 8.1-31    | .....                                                                |
| 89-GFPD-frag-III 8.1-180   | .....                                                                |
| 90-GFPD-frag-III 8.1-169   | .....                                                                |
| 91-GFPD-frag-III 8.1-21    | .....                                                                |
| 92-GFPD-frag-III 8.1-35    | .....                                                                |
| 93-GFPD-frag-III 8.22-18   | .....                                                                |
| 94-GFPD-frag-III 8.22-133  | .....                                                                |
| 95-GFPD-frag-III 8.22-163  | .....                                                                |
| 96-GFPD-frag-III 8.22-71   | .....                                                                |
| 97-GFPD-frag-III 8.22-61   | .....                                                                |
| 98-GFPD-frag-III 8.22-2    | .....                                                                |
| 99-GFPD-frag-III 8.22-123  | .....                                                                |
| 100-GFPD-frag-III 8.22-122 | .....                                                                |
| 101-GFPD-frag-III 8.22-122 | .....                                                                |
| 102-GFPD-frag-III 8.5-89   | .....                                                                |
| 103-GFPD-frag-III 8.5-87   | .....                                                                |
| 104-GFPD-frag-III 8.5-113  | .....                                                                |
| 105-GFPD-frag-III 8.5-113  | .....                                                                |
| 106-GFPD-frag-III 8.5-122  | .....                                                                |
| 107-GFPD-frag-III 8.5-128  | .....                                                                |
| 108-GFPD-frag-III 8.5-106  | .....                                                                |
| 109-GFPD-frag-III 8.5-269  | .....                                                                |
| 110-GFPD-frag-III 8.5-140  | .....                                                                |
| 111-GFPD-frag-III 8.5-117  | .....                                                                |
| 112-GFPD-frag-III 8.5-269  | .....                                                                |
| 113-GFPD-frag-III 8.5-272  | .....                                                                |
| 114-GFPD-frag-III 8.5-201  | .....                                                                |
| 115-GFPD-frag-III 8.5-201  | .....                                                                |
| 116-GFPD-frag-III 8.5-234  | .....                                                                |
| 117-GFPD-frag-III 8.5-232  | .....                                                                |
| 118-GFPD-frag-III 8.5-223  | .....                                                                |
| 119-GFPD-frag-III 8.5-223  | .....                                                                |
| 120-GFPD-frag-III 8.5-197  | .....                                                                |
| 121-GFPD-frag-III 8.18-121 | .....                                                                |
| 122-GFPD-frag-III 8.18-211 | .....                                                                |
| 123-GFPD-frag-III 8.18-65  | .....                                                                |
| 124-GFPD-frag-III 8.18-15  | .....                                                                |
| 125-GFPD-frag-III 8.18-15  | .....                                                                |
| 126-GFPD-frag-III 8.18-38  | .....                                                                |
| 127-GFPD-frag-III 8.18-44  | .....                                                                |
| 128-GFPD-frag-III 8.18-71  | .....                                                                |
| 129-GFPD-frag-III 8.18-251 | .....                                                                |
| 130-GFPD-frag-III 8.18-247 | .....                                                                |
| 131-GFPD-frag-III 8.18-103 | .....                                                                |
| 132-GFPD-frag-III 8.18-240 | .....                                                                |
| 133-GFPD-frag-III 8.18-240 | .....                                                                |
| 134-GFPD-frag-III 8.18-100 | .....                                                                |
